# Supplementary material for: Pirfenidone–flavonoid cocrystals with reduced solubility and dissolution rate
Source: Royal Society of Chemistry journal article supplement (doi:10.1039/d3ce00402c), 2023-01-01
Supplement: d3ce00402c1.pdf [file d3ce00402c1.pdf]

## Supporting Information

# Pirfenidone–flavonoid cocrystals with reduced solubility and dissolution rate

Lingshan Meng,<sup>a,b</sup> Duanxiu Li,<sup>b,c</sup> Yujing Zhu,<sup>b</sup> Jianming Wang,<sup>d</sup> Zongwu Deng<sup>b</sup> and Hailu Zhang<sup>a,b\*</sup>

<sup>a</sup> Nano Science and Technology Institute, University of Science and Technology of China, Suzhou 215123, P. R. China.

<sup>b</sup> Laboratory of Pharmaceutical Solid-State Chemistry, Suzhou Institute of Nano-Tech and Nano-Bionics, Chinese Academic of Sciences, Suzhou 215123, P. R. China.

<sup>c</sup> Guangdong Institute of Semiconductor Micro-Nano Manufacturing Technology, Foshan 528200, P. R. China.

<sup>d</sup> Crystal Formulation Services, Suzhou 215127, P. R. China.

\*Corresponding author. E-mail: hlzhang2008@sinano.ac.cn; Tel: +86-512-62872713; Fax: +86-512-62603079.

**Table S1** pH values after solubility tests

|         | pH 1.2   | pH 6.8    |
|---------|----------|-----------|
| PFD     | 1.37±0.0 | 7.02±0.11 |
|         | 8        |           |
| PFD-HES | 1.45±0.0 | 7.06±0.04 |
|         | 7        |           |
| PFD-GEN | 1.43±0.1 | 7.09±0.04 |
|         | 6        |           |

**Table S2** Intermolecular interaction energies ( $\text{kJ mol}^{-1}$ ) of PFD. (PFD as the central molecule)

| No | Molecule | N | Symop         | R     | $E_{\text{ele}}$ | $E_{\text{pol}}$ | $E_{\text{dis}}$ | $E_{\text{rep}}$ | $E_{\text{tot}}$ |
|----|----------|---|---------------|-------|------------------|------------------|------------------|------------------|------------------|
| 1  | PFD      | 2 | x, y, z       | 10.59 | -1.1             | -0.3             | -5.8             | 2.6              | -4.8             |
| 2  | PFD      | 2 | -x, y+1/2, -z | 5.54  | -10.1            | -2.3             | -36.5            | 22.8             | -30.0            |
| 3  | PFD      | 2 | x, y, z       | 6.25  | -13.4            | -5.0             | -19.6            | 21.3             | -21.7            |
| 4  | PFD      | 2 | -x, y+1/2, -z | 7.92  | -10.6            | -3.9             | -14.8            | 13.2             | -18.7            |
| 5  | PFD      | 2 | -x, y+1/2, -z | 9.24  | -1.0             | -0.3             | -6.3             | 1.7              | -5.7             |
| 6  | PFD      | 2 | -x, y+1/2, -z | 6.38  | -3.8             | -2.5             | -21.0            | 10.4             | -17.6            |
| 7  | PFD      | 2 | x, y, z       | 10.28 | -0.0             | -0.4             | -8.5             | 3.5              | -5.5             |

Total:  $-208.0 \text{ kJ mol}^{-1}$

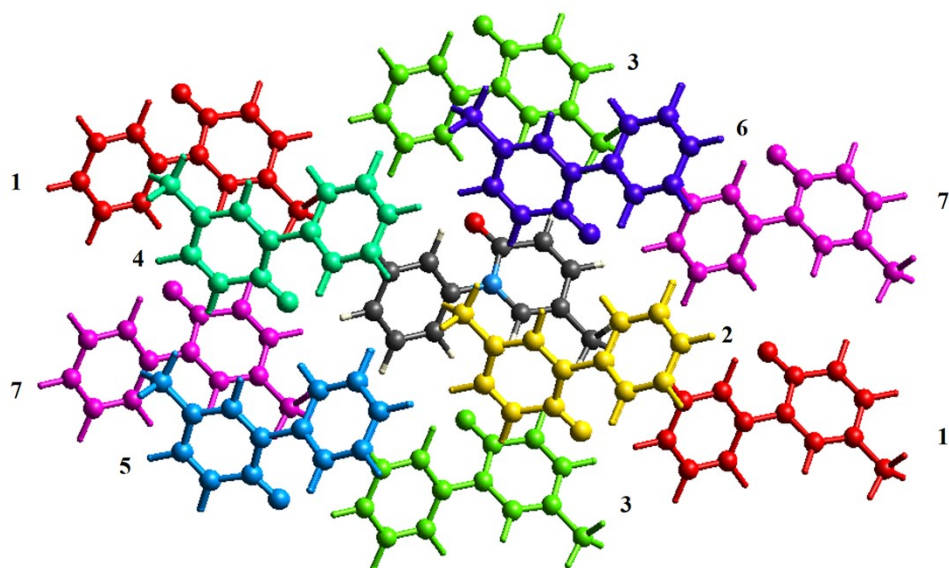

**Table S3** Intermolecular interaction energies ( $\text{kJ mol}^{-1}$ ) of PFD–HES. (PFD as the central molecule)

| No | Molecule | N | Symp                | R     | $E_{\text{ele}}$ | $E_{\text{pol}}$ | $E_{\text{dis}}$ | $E_{\text{rep}}$ | $E_{\text{tot}}$ |
|----|----------|---|---------------------|-------|------------------|------------------|------------------|------------------|------------------|
| 1  | HES      | 1 | -                   | 10.65 | -4.3             | -1.8             | -10.2            | 5.8              | -11.2            |
| 2  | HES      | 1 | -                   | 6.84  | -10.6            | -5.4             | -45.4            | 24.1             | -39.9            |
| 3  | HES      | 1 | -                   | 11.94 | -6.7             | -2.4             | -11.1            | 12.3             | -10.9            |
| 4  | HES      | 1 | -                   | 7.97  | -62.6            | -16.4            | -12.3            | 68.7             | -46.6            |
| 5  | PFD      | 2 | $-x+1/2, y+1/2, z$  | 5.74  | -1.7             | -0.7             | -21.5            | 7.9              | -16.1            |
| 6  | PFD      | 2 | $x, y, z$           | 6.64  | -2.2             | -2.9             | -15.0            | 6.7              | -13.3            |
| 7  | PFD      | 2 | $-x, y+1/2, -z+1/2$ | 8.15  | -4.4             | -1.4             | -12.5            | 6.0              | -12.9            |
| 8  | HES      | 1 | -                   | 12.72 | 0.8              | -0.2             | -4.8             | 1.8              | -2.3             |
| 9  | HES      | 1 | -                   | 11.82 | -5.8             | -1.2             | -10.0            | 9.4              | -9.9             |
| 10 | HES      | 1 | -                   | 12.46 | -2.7             | -0.3             | -4.1             | 1.2              | -5.9             |
| 11 | HES      | 1 | -                   | 13.04 | -0.4             | -0.3             | -4.6             | 1.6              | -3.7             |

Total:  $-215.0 \text{ kJ mol}^{-1}$

PFD-HES:  $-130.4 \text{ kJ mol}^{-1}$

PFD-PFD:  $-84.6 \text{ kJ mol}^{-1}$

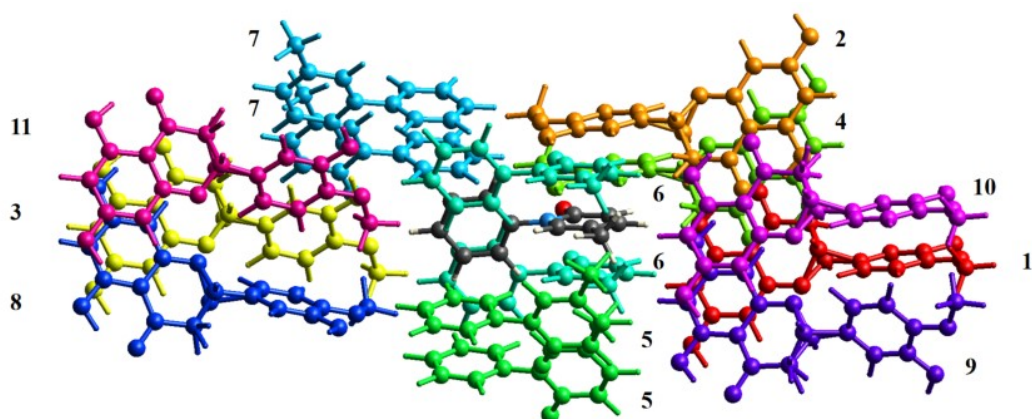

**Table S4** Intermolecular interaction energies ( $\text{kJ mol}^{-1}$ ) of PFD–HES. (HES as the central molecule)

| No | Molecule | N | Symop               | R     | E_ele | E_pol | E_dis | E_rep | E_tot |
|----|----------|---|---------------------|-------|-------|-------|-------|-------|-------|
| 1  | HES      | 2 | $-x+1/2, y+1/2, z$  | 4.83  | -14.3 | -5.0  | -78.8 | 55.0  | -53.4 |
| 2  | HES      | 1 | $-x, -y, -z$        | 7.40  | -14.3 | -3.4  | -31.7 | 41.7  | -19.5 |
| 3  | HES      | 2 | $x, y, z$           | 6.64  | 2.8   | -2.1  | -13.9 | 3.4   | -8.6  |
| 4  | PFD      | 1 | -                   | 6.84  | -10.6 | -5.4  | -45.4 | 24.1  | -39.9 |
| 5  | PFD      | 1 | -                   | 13.04 | -0.4  | -0.3  | -4.6  | 1.6   | -3.7  |
| 6  | PFD      | 1 | -                   | 12.72 | -0.8  | -0.2  | -4.8  | 1.8   | -2.3  |
| 7  | HES      | 2 | $x+1/2, -y+1/2, -z$ | 9.74  | -70.6 | -19.3 | -19.1 | 93.1  | -48.1 |
| 8  | HES      | 1 | $-x, -y, -z$        | 8.32  | -19.3 | -8.1  | -27.8 | 11.7  | -43.4 |
| 9  | PFD      | 1 | -                   | 7.97  | -62.6 | -16.4 | -12.3 | 68.7  | -46.6 |
| 10 | PFD      | 1 | -                   | 10.65 | -4.3  | -1.8  | -10.2 | 5.8   | -11.2 |
| 11 | PFD      | 1 | -                   | 11.82 | -5.8  | -1.2  | -10.0 | 9.4   | -9.9  |
| 12 | PFD      | 1 | -                   | 11.94 | -6.7  | -2.4  | -11.1 | 12.3  | -10.9 |
| 13 | PFD      | 1 | -                   | 12.46 | -2.7  | -0.3  | -4.1  | 1.2   | -5.9  |

Total:  $-413.5 \text{ kJ mol}^{-1}$

HES-PFD:  $-130.4 \text{ kJ mol}^{-1}$

HES-HES:  $-283.1 \text{ kJ mol}^{-1}$

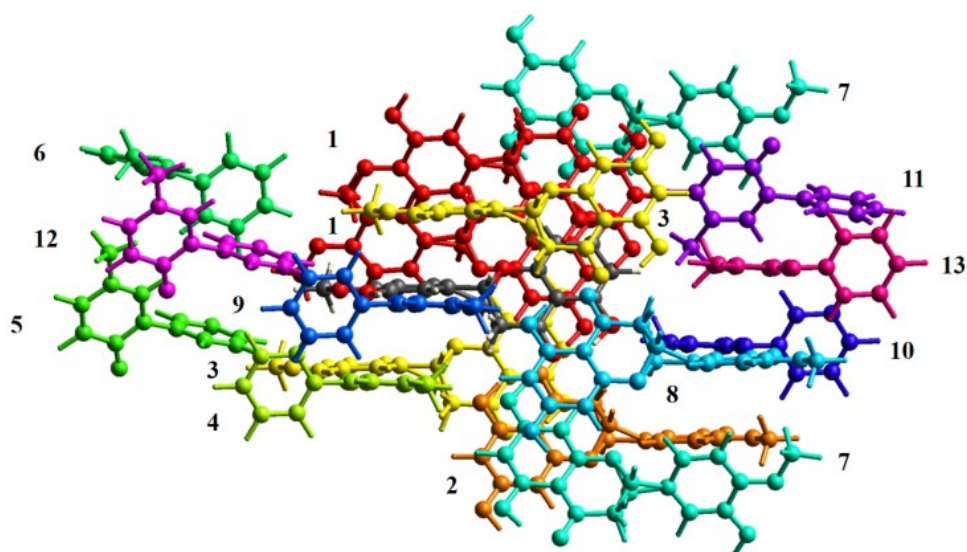

**Table S5** Intermolecular interaction energies ( $\text{kJ mol}^{-1}$ ) of PFD–GEN. (PFD<sup>a</sup> as the central molecule)

| No | Molecule         | N | Symop        | R     | E_ele | E_pol | E_dis | E_rep | E_tot |
|----|------------------|---|--------------|-------|-------|-------|-------|-------|-------|
| 1  | GEN              | 1 | -            | 7.80  | -3.4  | -1.1  | -12.5 | 6.2   | -11.4 |
| 2  | GEN              | 1 | -            | 9.18  | 2.6   | -0.9  | -7.6  | 1.5   | -3.6  |
| 3  | PFD <sup>a</sup> | 2 | x, -y, z+1/2 | 11.08 | -0.2  | -0.2  | -4.1  | 1.9   | -2.8  |
| 4  | PFD <sup>b</sup> | 1 | -            | 4.42  | -18.7 | -5.3  | -50.0 | 37.5  | -44.0 |
| 5  | GEN              | 1 | -            | 6.06  | -21.9 | -6.0  | -28.2 | 28.7  | -34.5 |
| 6  | GEN              | 1 | -            | 8.93  | -3.7  | -0.8  | -13.1 | 11.4  | -8.9  |
| 7  | PFD <sup>b</sup> | 1 | -            | 11.18 | 0.2   | -0.2  | -4.4  | 3.8   | -1.5  |
| 8  | PFD <sup>b</sup> | 1 | -            | 4.33  | -13.0 | -4.6  | -47.6 | 27.2  | -41.8 |
| 9  | GEN              | 1 | -            | 7.10  | -7.8  | -1.6  | -20.3 | 12.6  | -19.3 |
| 10 | GEN              | 1 | -            | 7.77  | -1.3  | -0.2  | -10.2 | 4.8   | -7.4  |
| 11 | GEN              | 1 | -            | 9.76  | -66.0 | -17.8 | -11.6 | 67.1  | -51.6 |
| 12 | PFD <sup>b</sup> | 1 | -            | 8.12  | -0.2  | -1.1  | -3.1  | 0.1   | -3.3  |
| 13 | PFD <sup>b</sup> | 1 | -            | 9.95  | -3.4  | -0.5  | -4.2  | 0.3   | -7.5  |

Total:  $-240.4 \text{ kJ mol}^{-1}$

PFD<sup>a</sup>-PFD<sup>a</sup>:  $-5.6 \text{ kJ mol}^{-1}$

PFD<sup>a</sup>-PFD<sup>b</sup>:  $-98.1 \text{ kJ mol}^{-1}$

PFD<sup>a</sup>-GEN:  $-136.7 \text{ kJ mol}^{-1}$

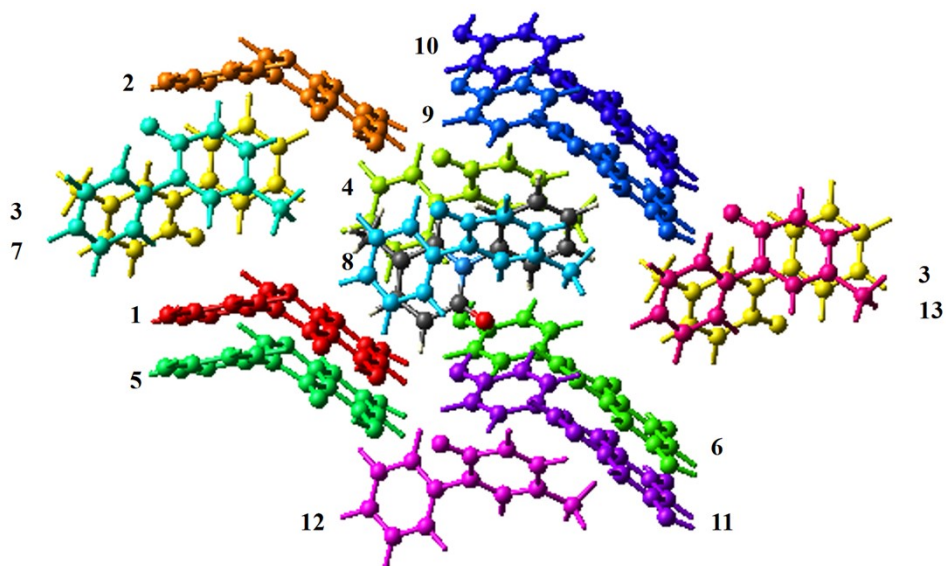

**Table S6** Intermolecular interaction energies ( $\text{kJ mol}^{-1}$ ) of PFD–GEN. (PFD<sup>b</sup> as the central molecule)

| No | Molecule         | N | Symop        | R     | E_ele | E_pol | E_dis | E_rep | E_tot |
|----|------------------|---|--------------|-------|-------|-------|-------|-------|-------|
| 1  | GEN              | 1 | -            | 10.34 | -0.6  | -0.1  | -1.7  | 0.0   | -2.1  |
| 2  | GEN              | 1 | -            | 7.62  | -3.3  | -0.5  | -17.9 | 10.4  | -13.0 |
| 3  | PFD <sup>a</sup> | 1 | x, -y, z+1/2 | 4.33  | -13.0 | -4.6  | -47.6 | 27.2  | -41.8 |
| 4  | PFD <sup>b</sup> | 2 | -            | 11.04 | -0.1  | -0.2  | -5.7  | 3.8   | -3.0  |
| 5  | PFD <sup>a</sup> | 1 | -            | 4.42  | -18.7 | -5.3  | -50.0 | 37.5  | -44.0 |
| 6  | PFD <sup>a</sup> | 1 | -            | 9.95  | -3.4  | -0.5  | -4.2  | 0.3   | -7.5  |
| 7  | GEN              | 1 | -            | 8.18  | -2.8  | -1.1  | -19.3 | 10.7  | -14.0 |
| 8  | PFD <sup>a</sup> | 1 | -            | 11.18 | 0.2   | -0.2  | -4.4  | 3.8   | -1.5  |
| 9  | GEN              | 1 | -            | 8.43  | -2.3  | -1.6  | -8.8  | 6.2   | -7.4  |
| 10 | GEN              | 1 | -            | 5.53  | -8.4  | -1.3  | -35.6 | 21.6  | -27.5 |
| 11 | GEN              | 1 | -            | 9.53  | -66.9 | -17.6 | -12.3 | 71.1  | -50.5 |
| 12 | GEN              | 1 | -            | 9.48  | 1.3   | -1.0  | -5.7  | 1.0   | -3.6  |
| 13 | PFD <sup>a</sup> | 1 | -            | 8.12  | 0.2   | -1.1  | -3.1  | 0.1   | -3.3  |

Total:  $-222.2 \text{ kJ mol}^{-1}$

PFD<sup>b</sup>-PFD<sup>a</sup>:  $-98.1 \text{ kJ mol}^{-1}$

PFD<sup>b</sup>-PFD<sup>b</sup>:  $-6.0 \text{ kJ mol}^{-1}$

PFD<sup>b</sup>-GEN:  $-118.1 \text{ kJ mol}^{-1}$

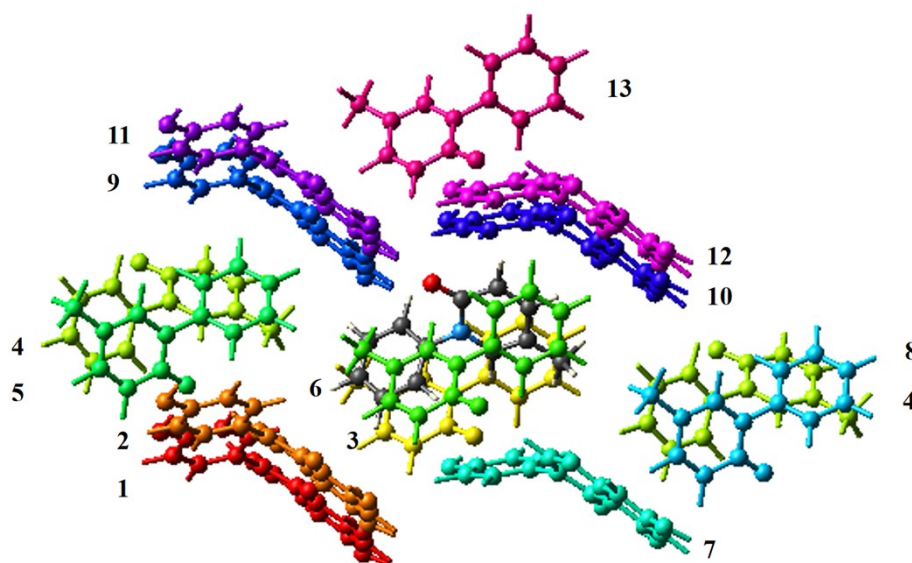

**Table S7** Intermolecular interaction energies ( $\text{kJ mol}^{-1}$ ) of PFD–GEN. (GEN as the central molecule)

| No | Molecule         | N | Symop        | R     | $E_{\text{ele}}$ | $E_{\text{pol}}$ | $E_{\text{dis}}$ | $E_{\text{rep}}$ | $E_{\text{tot}}$ |
|----|------------------|---|--------------|-------|------------------|------------------|------------------|------------------|------------------|
| 1  | PFD <sup>b</sup> | 1 | -            | 8.43  | -2.3             | -1.6             | -8.8             | 6.2              | -7.4             |
| 2  | PFD <sup>a</sup> | 1 | -            | 9.18  | 2.6              | -0.9             | -7.6             | 1.5              | -3.6             |
| 3  | PFD <sup>b</sup> | 1 | -            | 9.53  | -66.9            | -17.6            | -12.3            | 71.1             | -50.5            |
| 4  | GEN              | 2 | x, -y, z+1/2 | 10.74 | -4.1             | -1.5             | -9.7             | 6.7              | -9.7             |
| 5  | GEN              | 2 | x, y, z      | 8.28  | -1.4             | -2.6             | -17.1            | 10.7             | -11.7            |
| 6  | PFD <sup>a</sup> | 1 | -            | 9.76  | -66.0            | -17.8            | -11.6            | 67.1             | -51.6            |
| 7  | PFD <sup>a</sup> | 1 | -            | 7.80  | -3.4             | -1.1             | -12.5            | 6.2              | -11.4            |
| 8  | PFD <sup>a</sup> | 1 | -            | 7.10  | -7.8             | -1.6             | -20.3            | 12.6             | -19.3            |
| 9  | PFD <sup>b</sup> | 1 | -            | 9.48  | -1.3             | -1.0             | -5.7             | 1.0              | -3.6             |
| 10 | PFD <sup>b</sup> | 1 | -            | 8.18  | -2.8             | -1.1             | -19.3            | 10.7             | -14.0            |
| 11 | PFD <sup>b</sup> | 1 | -            | 10.34 | -0.6             | -0.1             | -1.7             | 0.0              | -2.1             |
| 12 | GEN              | 2 | x, -y, z+1/2 | 12.01 | 1.0              | -0.2             | -1.4             | 0.0              | -0.3             |
| 13 | PFD <sup>a</sup> | 1 | -            | 6.06  | -21.9            | -6.0             | -28.2            | 28.7             | -34.5            |
| 14 | PFD <sup>a</sup> | 1 | -            | 8.93  | -3.7             | -0.8             | -13.1            | 11.4             | -8.9             |
| 15 | PFD <sup>a</sup> | 1 | -            | 7.77  | -1.3             | -0.2             | -10.2            | 4.8              | -7.4             |
| 16 | PFD <sup>b</sup> | 1 | -            | 5.53  | -8.4             | -1.3             | -35.6            | 21.6             | -27.5            |
| 17 | PFD <sup>b</sup> | 1 | -            | 7.62  | -3.3             | -0.5             | -17.9            | 10.4             | -13.0            |

Total:

GEN-PFD<sup>a</sup>:  $-136.7 \text{ kJ mol}^{-1}$

GEN-PFD<sup>b</sup>:  $-118.1 \text{ kJ mol}^{-1}$

GEN-GEN:  $-43.4 \text{ kJ mol}^{-1}$

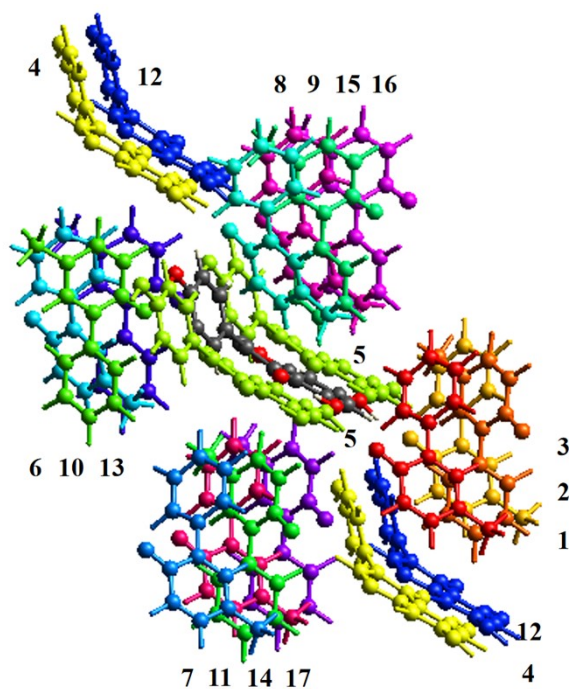



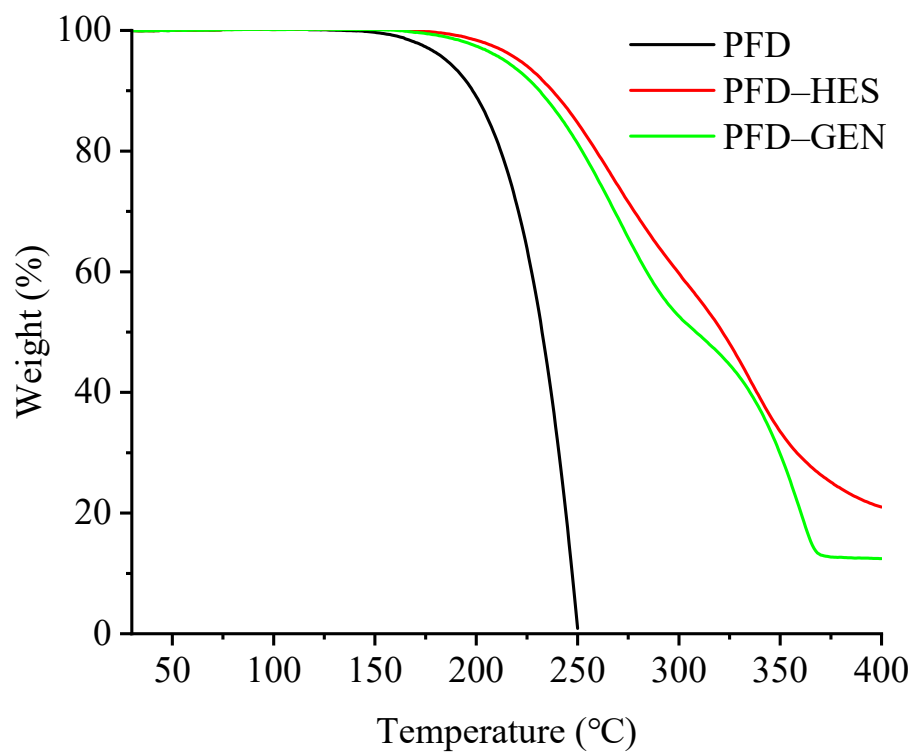

**Fig. S1** TGA curves of PFD, PFD-HES, and PFD-GEN.

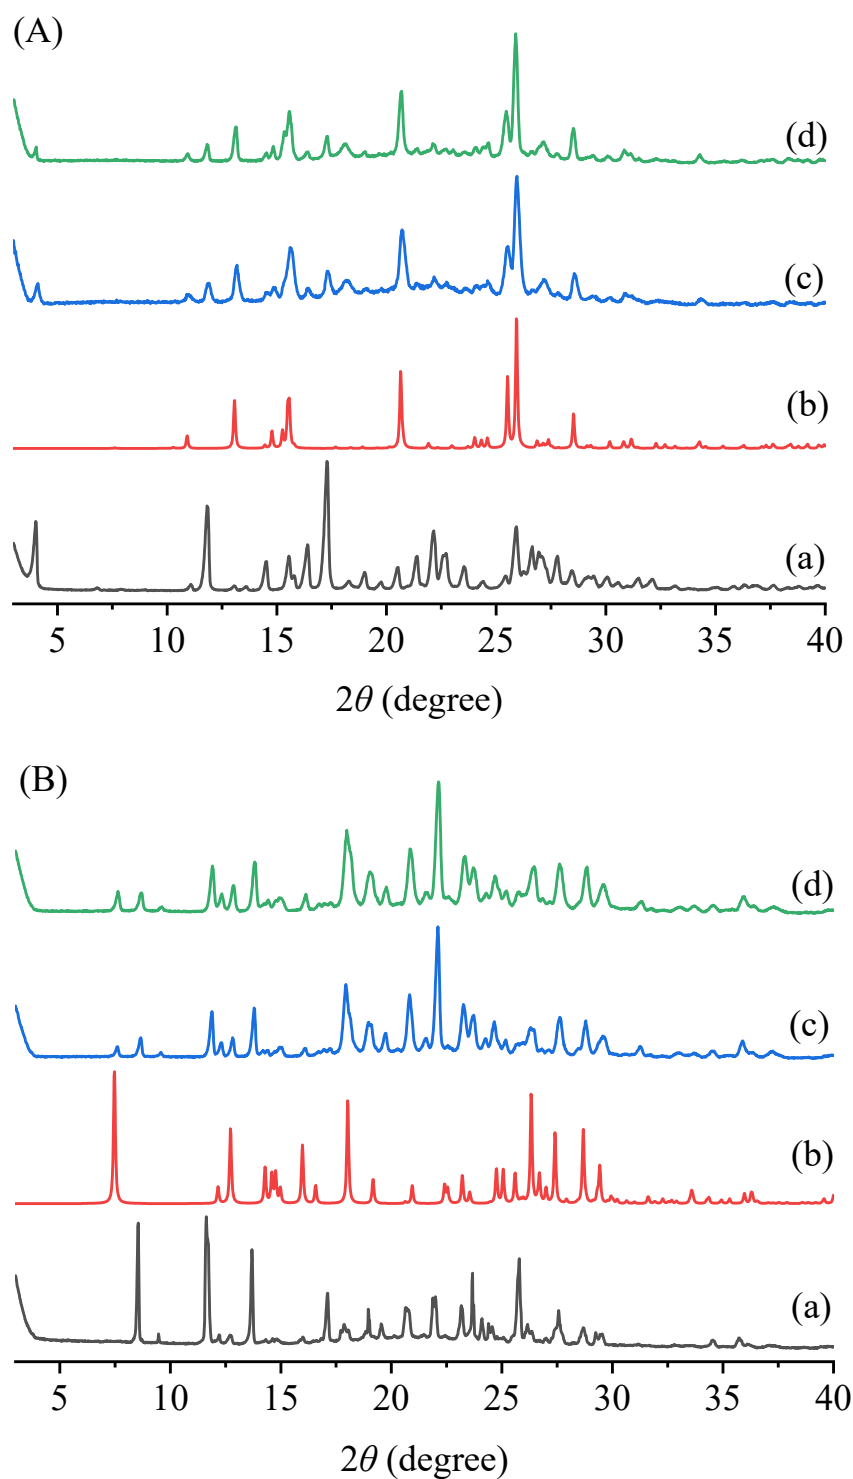

**Fig. S2** Powder XRD patterns of the residual materials after equilibrium solubility tests. (A) PFD–HES: (a) experimental XRD pattern of PFD–HES, (b) simulated XRD pattern of HES·H<sub>2</sub>O, (c) experimental XRD pattern of residue in pH 1.2 solution, and (d) experimental XRD pattern of residue in pH 6.8 buffer. (B) PFD–GEN: (a) experimental XRD pattern of PFD–GEN, (b) simulated XRD pattern of GEN, (c) experimental XRD pattern of residue in pH 1.2 solution, and (d) experimental XRD pattern of residue in pH 6.8 buffer.

**Table S8** IDR values ( $\text{mg mL}^{-1} \text{cm}^{-2} \text{min}^{-1}$ ) of PFD, PFD–HES, and PFD–GEN

|         | pH 1.2                                        | pH 6.8                                        |
|---------|-----------------------------------------------|-----------------------------------------------|
| PFD     | $2.57 \times 10^{-3} \pm 2.16 \times 10^{-5}$ | $2.92 \times 10^{-3} \pm 2.89 \times 10^{-5}$ |
| PFD–HES | $1.77 \times 10^{-4} \pm 2.72 \times 10^{-6}$ | $1.77 \times 10^{-4} \pm 1.62 \times 10^{-6}$ |
| PFD–GEN | $4.14 \times 10^{-5} \pm 1.13 \times 10^{-6}$ | $6.71 \times 10^{-5} \pm 2.87 \times 10^{-6}$ |
